# Supplementary material for: Integrated Analysis of Urban Heat Islands in Historical Heritage Contexts: The Case of Matera
Source: Preprints.org preprint supplement (doi:10.20944/preprints202407.0860.v1), 2024-07-10
Supplement: Supplementary file 1 [file supplementary]

## Sheet: studies without validation (2)
	#	Authors (year)	Ref.	Urban setting	Equations / Models	Validation Parameter	Keywords	Parameters		(m/s) (WV);	AT, PC, Ri, WV	(°C) (ST)	(°C) (AT);	(HF);	(CHTC);	(°C) (DBT)	(%) (RH)	(AKNNE);	(CKEKE) [150];	[159] (DSGS);	[151](DKE);	[101](ED);	[149,152] (LRNKE);	[153] (MEE);	[131](MDKE);	[154](RKE);	[155](RNGKE);	Smagorinsky-LillySubgrid-scale[160];	[156](SSTKW);	[157](STKE);	Yamada and Mellor E-ε[158](YMEE).Air change rate(1/hour)(ACH);	Air quality index(-)(AQI);	Building energy consumption(W)(BEC);	Convective heat transfer coeﬃcient (W/m2K)(CHTC);	Froude number (-)(Fn);Heatﬂux(w/m2)(HF);Indoorairtemperature(°C)(IAT);	Mean radiant temperature(°C)(MRT);	(°C)[161](PET);	[162](PMV);	PMV(-)(EPMV)[163];	Pressure (coeﬃcient)(CP);	Pollutant concentration(%)(PC);	Pressure distribution(PD);	Relative humidity(%)(RH);	Sky view factor(-)(SVF);	Solar access index(-)(SAI);	Solar radiation(W/m2)(SR);	Standard eﬀective temperature(°C)[164](SET);	Statistical Performance Indicators(SPI);	Temperature-humidity index(-)(THI);
	1	Gu et al. (2010)	[216]	Open space, street canyon	LES / SLSGS	WV	Vegetation, thermal stability, canyon, pollutant dispersion, surface heating	AT, WV		1			1
	2	Li et al. (2010)	[217]	Street canyon	LES / SLSGS	Ri	Surface heating, canyon, thermal stability, pollutant dispersion, flow	AT, PC, Ri, WV		1	1		1																												1
	3	Kwak et al. (2011)	[219]	Street canyon	RANS / RNGKE	ST	Canyon, diurnal variation, wind (flow), radiation, surface heating	AT, HF, ST, WV		1		1	1	1
	4	Yaghoobian et al. (2014)	[222]	Street canyon	LES / DSGS	Fr, WV	Diurnal variation, wind(flow), canyon, thermal stability, material (albedo)	Fr, HF, PD, ST, TKE, WV		1		1		1																												1
	5	Qaid and Ossen (2014)	[224]	Street canyon	RANS / YMEE	AT	Aspect ratio, building form (height), climate (hot and arid), specific forms (courtyards)	AT, ST, WV		1		1	1
	6	Bottillo et al. (2014)	[211]	Street canyon	RANS / STKE	AT, WV	Canyon, radiation, model development, heat transfer, wind (flow)	AT, CHTC, ST, WV		1		1	1		1
	7	Santiago et al. (2014)	[212]	Street canyon	RANS / STKE	AT, WV	Radiation (solar), orientation, heat transfer, wind (flow), model development	AT, WV		1			1
	8	Herbert et al. (1998)	[169]	Street canyon	RANS / STKE		Material (albedo), seasonal variation, diurnal variation, canyon, energy budget	AT					1
	9	Herbert and Herbert (2002)	[170]	Street canyon	RANS / STKE		Canyon, aspect ratio, energy budget, heat transfer, building form (height)	AT					1
	10	Baik et al. (2003)	[172]	Street canyon	RANS / ED		Heat transfer, canyon, pollutant dispersion, wind (flow), turbulent heat fluxes	AT, ST, WV		1		1	1
	11	Ali-Toudert and Mayer (2006)	[175]	Street canyon	RANS / YMEE		Thermal comfort, aspect ratio, orientation, urban design, canyon	AT, SAI, PET					1
	12	Zhao et al. (2008)	[180]	Urban street canyon	Not specified		Aspect ratio, materials, orientation, building form (facades), canyon	AT, SET, ST, WBGT				1	1																																		1
	13	Dimitrova et al. (2009)	[182]	Urban street canyon	RANS / ED		Canyon, wind, heat transfer, model development, building form (facades)	AT, WV		1			1
	14	Hong et al. (2011)	[184]	Street canyon	RANS / STKE		Vegetation, wind, optimization, canyon, radiation (solar)	AT, WV		1			1
	15	Park et al. (2012)	[185]	Street canyon	LES / DSGS		Canyon, wind, heat transfer, surface heating, case comparison	AT, TKE, WV		1			1
	16	Bo-ot et al. (2012)	[187]	Urban street canyon	RANS / STKE		Vegetation, energy (building), urban form, case comparison, optimization	AT, BEC, WV		1			1																				1
	17	de Lieto Vollaro et al. (2014)	[194]	Street canyon	RANS / STKE		Canyon, radiation (solar), aspect ratio, model development, case comparison	AT, WV		1			1
	18	Wang et al. (2014)	[195]	Urban street canyon	RANS / STKE		Canyon, wind, ventilation, heat transfer, building form (façade)	HF, PD, VR, WVV		1				1																												1
	19	Kim et al. (2014)	[196]	Urban street canyon	RANS / STKE		Canyon, wind, vegetation, case comparison, building form (roof)	AT, TKE, WV, WVV		1			1
	20	Bottillo et al. (2014)	[198]	Street canyon	RANS / STKE		Canyon, wind, heat transfer, solar radiation, model development	CHTC, RI, ST, WV		1	1	1			1
										16	2	7	17	3	2	0	0	0	0	0	0	0	0	0	0	0	0	0	0	0	0	0	1	0	0	0	0	0	0	0	1	2	0	0	0	0	1	0	0
	1	Air temperature (°C) (AT);	44	#REF!
	2	Wind velocity (m/s) (WV);	38	#REF!
	3	Surface temperature (°C) (ST)	20	#REF!
	4	Mean radiant temperature(°C)(MRT);	10	#REF!
	5	Heat ﬂux (w/m2) (HF);	9	#REF!
	6	Standard eﬀective temperature(°C)[164](SET);	8	#REF!
	7	Convective heat transfer coeﬃcient (W/m2K) (CHTC);	7	#REF!
	8	Building energy consumption(W)(BEC);	6	#REF!
	9	Relative humidity (%) (RH)	5	#REF!
	10	Physiological equivalent temperature(°C)[161](PET);	5	#REF!
	11	Turbulentkineticenergy(m2/s2)(TKE);	4	#REF!
	12	Richardson number (-) (Ri)	3	#REF!
	13	Dry-bulb Temperature (°C) (DBT)	3	#REF!
	14	Predicted mean vote(-)[162](PMV);	3	#REF!
	15	Pressure distribution(PD);	3	#REF!
	16	Wet black globe temperature(°C)(WBGT);	2	#REF!
	17	Temperature of equivalent perception(°C)[165](TEP);	2	#REF!
	18	Solar radiation(W/m2)(SR);	2	#REF!
	19	Pollutant concentration(%)(PC);	2	#REF!
	20	Yamada and Mellor E-ε[158](YMEE).Air change rate(1/hour)(ACH);	1	#REF!
	21	Air quality index(-)(AQI);	1	#REF!
	22	Froude number (-)(Fn);Heatﬂux(w/m2)(HF);Indoorairtemperature(°C)(IAT);	1	#REF!
	23	Sky view factor(-)(SVF);	1	#REF!
	24	Solar access index(-)(SAI);	1	#REF!
	25	Temperature-humidity index(-)(THI);	1	#REF!
	26	Ventilation rate(l/minute)(VR);	1	#REF!
	27	Water vapor fraction(%)(WVF);	1	#REF!
	28	Wind comfort index(-)(WCI)	1	#REF!
	29	Wind velocity vectors(WVV).	1	#REF!
					4400
					72.1311
[truncated: 10 more columns]

## Sheet: studies without validation
	#	Authors (year)	Ref.	Urban setting	Equations / Models	Validation Parameter	Keywords	Parameters		(m/s) (WV);	Ric (Ri)	(°C) (ST)	(°C) (AT);	(HF);	(CHTC);	(°C) (DBT)	(%) (RH)	(AKNNE);	(CKEKE) [150];	[159] (DSGS);	[151](DKE);	[101](ED);	[149,152] (LRNKE);	[153] (MEE);	[131](MDKE);	[154](RKE);	[155](RNGKE);	Smagorinsky-LillySubgrid-scale[160];	[156](SSTKW);	[157](STKE);	Yamada and Mellor E-ε[158](YMEE).Air change rate(1/hour)(ACH);	Air quality index(-)(AQI);	Building energy consumption(W)(BEC);	Convective heat transfer coeﬃcient (W/m2K)(CHTC);	Froude number (-)(Fn);Heatﬂux(w/m2)(HF);Indoorairtemperature(°C)(IAT);	Mean radiant temperature(°C)(MRT);	(°C)[161](PET);	[162](PMV);	PMV(-)(EPMV)[163];	Pressure (coeﬃcient)(CP);	Pollutant concentration(%)(PC);	Pressure distribution(PD);	Relative humidity(%)(RH);	Sky view factor(-)(SVF);	Solar access index(-)(SAI);	Solar radiation(W/m2)(SR);	Standard eﬀective temperature(°C)[164](SET);	Statistical Performance Indicators(SPI);	Temperature-humidity index(-)(THI);
	1	Gu et al. (2010)	[216]	Open space, street canyon	LES / SLSGS	WV	Vegetation, thermal stability, canyon, pollutant dispersion, surface heating	AT, WV		1			1
	2	Li et al. (2010)	[217]	Street canyon	LES / SLSGS	Ri	Surface heating, canyon, thermal stability, pollutant dispersion, flow	AT, PC, Ri, WV		1	1		1																												1
	3	Mirzaei and Haghighat (2010)	[218]	Building blocks, urban street	RANS / STKE	WV	Ventilation, mitigation, thermal comfort, pedestrian, thermal stability	AT, Ri, WV		1	1		1
	4	Kwak et al. (2011)	[219]	Street canyon	RANS / RNGKE	ST	Canyon, diurnal variation, wind (flow), radiation, surface heating	AT, HF, ST, WV		1		1	1	1
	5	Luo and Li (2011)	[220]	Building blocks	RANS / RNGKE and SSTKW	WV	Ventilation, wind (flow), canyon, surface heating, building form (height)	ACH, AT, WV		1			1																		1
	6	Qu et al. (2011)	[207]	Building blocks	RANS / STKE	ST	Coupling, model development, heat transfer, wind (flow), diurnal variation	CHTC, HF, ST				1		1	1
	7	Haghighat and Mirzaei (2011)	[221]	Building blocks	RANS / RNGKE	AT, WV	Surface heating, thermal stability, ventilation, material (albedo), canyon	AT, PC, WV		1			1																												1
	8	Pillai and Yoshie (2012)	[215]	Building blocks	RANS / LRNKE	AT, HF, WV	CHTC, urban form, building form (height), case comparison, urban density	AT, CHTC, HF, WV		1			1	1	1
	9	Mirzaei and Carmeliet (2013)	[208]	Building blocks	RANS / RNGKE	WV	Canyon, wind, model development, case comparison, orientation	ST, WV		1		1
	10	Vidrih and Medved (2013)	[209]	Open space (urban park) Building blocks	RANS / RNGKE	AT	Vegetation, urban density, climate, case comparison, model development	AT					1
	11	Pillai and Yoshie (2013)	[214]		RANS / LRNKE	HF	CHTC, flow, thermal stability, surface heating, case comparison	AT, CHTC, HF					1	1	1
	12	Liu et al. (2013)	[210]	Building blocks	LES / SLSGS; RANS / SSTKW, RKE	CHTC, ST	CHTC, urban density, building energy, model development, case comparison	CHTC, ST, WV		1		1			1
	13	Yaghoobian et al. (2014)	[222]	Street canyon	LES / DSGS	Fr, WV	Diurnal variation, wind(flow), canyon, thermal stability, material (albedo)	Fr, HF, PD, ST, TKE, WV		1		1		1																												1
	14	Taleghani et al. (2014)	[223]	Building blocks, courtyards	RANS / YMEE	AT	Thermal comfort, orientation, urban form, case comparison, specific forms (courtyards)	AT, MRT, PET, WV		1			1																							1	1
	15	Qaid and Ossen (2014)	[224]	Street canyon	RANS / YMEE	AT	Aspect ratio, building form (height), climate (hot and arid), specific forms (courtyards)	AT, ST, WV		1		1	1
	16	Bottillo et al. (2014)	[211]	Street canyon	RANS / STKE	AT, WV	Canyon, radiation, model development, heat transfer, wind (flow)	AT, CHTC, ST, WV		1		1	1		1
	17	Santiago et al. (2014)	[212]	Street canyon	RANS / STKE	AT, WV	Radiation (solar), orientation, heat transfer, wind (flow), model development	AT, WV		1			1
	18	Nazarian and Kleissl (2015)	[225]	Building blocks	RANS / RKE	ST	Material (albedo), aspect ratio, heat transfer, canyon, diurnal variation	HF, SR, ST, WV		1		1		1																																1
	19	Ghaffarianhoseini et al. (2015)	[226]	Courtyards	RANS / YMEE	DBT	Thermal comfort, building form, albedo, vegetation, specific forms (courtyards)	AT, DBT, MRT, PET, PMV,					1			1																				1	1	1
	20	Xue et al. (2015)	[213]	Open space (water body)	RANS / STKE	DBT, RH	Water body, heat transfer, model development, wind (flow), adaptation	DBT, RH								1	1
	21	Yumino et al. (2015)	[206]	Building blocks	RANS / DKE	HF, ST	Adaptation / mitigation, climate, vegetation, materials (albedo), building form	BEC, HF, MRT, SET, ST, WBGT				1		1																			1			1											1
	22	Bruse and Fleer (1998)	[168]	Building blocks	RANS / YMEE		Model development, vegetation, heat transfer, urban form, wind	AT, WV		1			1
	23	Herbert et al. (1998)	[169]	Street canyon	RANS / STKE		Material (albedo), seasonal variation, diurnal variation, canyon, energy budget	AT					1
	24	Herbert and Herbert (2002)	[170]	Street canyon	RANS / STKE		Canyon, aspect ratio, energy budget, heat transfer, building form (height)	AT					1
	25	Dimoudi and Nikolopoulou (2003)	[171]	Building blocks	Not specified		Vegetation, urban density, case comparison, radiation (SVF), orientation	AT					1
	26	Baik et al. (2003)	[172]	Street canyon	RANS / ED		Heat transfer, canyon, pollutant dispersion, wind (flow), turbulent heat fluxes	AT, ST, WV		1		1	1
	27	Robitu et al. (2004)	[173]	Open space (water pond)	RANS / STKE		Water body, heat transfer, building energy, turbulent heat fluxes, coupling	AT, ST, WVF				1	1
	28	Murakami (2004)	[174]	Building blocks	RANS / MDKE		Model development, urban morphology, vegetation, case comparison, thermal comfort	AT, MRT, SET					1																							1											1
	29	Ali-Toudert and Mayer (2006)	[175]	Street canyon	RANS / YMEE		Thermal comfort, aspect ratio, orientation, urban design, canyon	AT, SAI, PET					1
	30	Murakami (2006)	[176]	Building blocks	RANS / MDKE		Model development, urban morphology, vegetation, case comparison, thermal comfort	AT, MRT, SET					1																								1								1
	31	Grignaffini and Vallati (2007)	[177]	Building blocks, open space	RANS / MDKE		Vegetation, climate (scenario analysis), urban morphology, materials, wind	AT, ST				1	1
	32	Lin et al. (2008)	[178]	Building blocks	RANS / STKE		Vegetation, thermal comfort, urban form, pedestrian, case comparison	AT, RH, SET, MRT, WV		1			1				1																			1											1
	33	Chen et al. (2008)	[179]	Building blocks	RANS / MDKE		Optimization, vegetation, model development, thermal comfort, coupling	AT, MRT, SET, WV		1			1																							1											1
	34	Zhao et al. (2008)	[180]	Urban street canyon	Not specified		Aspect ratio, materials, orientation, building form (facades), canyon	AT, SET, ST, WBGT				1	1																																		1
	35	Ooka et al. (2008)	[181]	Building blocks	RANS / MDKE		Vegetation, optimization, thermal comfort, model development, economy	ECN, SET, SVF								1																												1			1
	36	Dimitrova et al. (2009)	[182]	Urban street canyon	RANS / ED		Canyon, wind, heat transfer, model development, building form (facades)	AT, WV		1			1
	37	Okeil (2010)	[183]	Building blocks	RANS / YMEE		Building form, energy (building), urban form, radiation (solar), vegetation	AT, WV		1			1
	38	Hong et al. (2011)	[184]	Street canyon	RANS / STKE		Vegetation, wind, optimization, canyon, radiation (solar)	AT, WV		1			1
	39	Park et al. (2012)	[185]	Street canyon	LES / DSGS		Canyon, wind, heat transfer, surface heating, case comparison	AT, TKE, WV		1			1
	40	Berkovic et al. (2012)	[186]	Courtyard	RANS / YMEE		Thermal comfort, specific forms (courtyards), radiation (shading), orientation, case comparison	AT, PMV, RH, SR					1				1																					1								1
	41	Qu et al. (2012)	[145]	Building blocks	RANS / STKE		Heat transfer, coupling, model development, radiation (solar), wind	AT, ST, TKE, WV		1		1	1
	42	Bo-ot et al. (2012)	[187]	Urban street canyon	RANS / STKE		Vegetation, energy (building), urban form, case comparison, optimization	AT, BEC, WV		1			1																				1
	43	Mirzaei and Haghighat (2012)	[188]	Building blocks	RANS / STKE		Aspect ratio, material (albedo), building form (façade), thermal comfort, case comparison	AQI, THI, WCI																								1																	1
	44	Yang et al. (2012)	[189]	Building blocks	RANS / YMEE		Energy (building), urban form, vegetation, model coupling, case comparison	AT, BEC, IAT, RH, WT		1			1				1																1		1
	45	Lee et al. (2013)	[190]	Building blocks	RANS / RKE		Building form (height), urban form, ventilation, case comparison, wind	WV		1
	46	Johansson et al. (2013)	[191]	Building blocks, open space	RANS / YMEE		Building form (height), materials, vegetation, urban density, thermal comfort	AT, MRT, RH, ST, TEP, WV		1		1	1				1																			1
	47	Yahia and Johansson (2013)	[192]	Building blocks	RANS / YMEE		Urban planning, aspect ratio, vegetation, orientation, thermal comfort	PET, ST				1																									1
	48	Hong and Lin (2014)	[193]	Building blocks	RANS / STKE		Urban morphology, vegetation, thermal comfort, ventilation, case comparison	AT, MRT, SET, VW, WV		1			1																							1
	49	de Lieto Vollaro et al. (2014)	[194]	Street canyon	RANS / STKE		Canyon, radiation (solar), aspect ratio, model development, case comparison	AT, WV		1			1
	50	Wang et al. (2014)	[195]	Urban street canyon	RANS / STKE		Canyon, wind, ventilation, heat transfer, building form (façade)	HF, PD, VR, WVV		1				1																												1
	51	Kim et al. (2014)	[196]	Urban street canyon	RANS / STKE		Canyon, wind, vegetation, case comparison, building form (roof)	AT, TKE, WV, WVV		1			1
	52	Perini and Magliocco (2014)	[197]	Building blocks	RANS / YMEE		Urban density, aspect ratio, vegetation, thermal comfort, case comparison	AT, MRT, PMV					1																							1		1
	53	Bottillo et al. (2014)	[198]	Street canyon	RANS / STKE		Canyon, wind, heat transfer, solar radiation, model development	CHTC, RI, ST, WV		1	1	1			1
	54	Yahia and Johansson (2014)	[199]	Building blocks	RANS / YMEE		Urban design, aspect ratio, vegetation, orientation, thermal comfort	PET, ST				1																									1
	55	Ma et al. (2015)	[200]	Building blocks	RANS / DKE		Thermal comfort, statistical analysis, model development, pedestrians, diurnal variation	MRT, SET, WV		1																										1											1
	56	Liu et al. (2015)	[201]	Building blocks	LES / SLSGS; RANS / RKE, SSTKW		CHTC, energy (building), urban density, wind, model development	BEC, CHTC, ST				1			1																		1
	57	Hong and Lin (2015)	[147]	Building blocks	RANS / STKE		Urban form, vegetation, optimization, thermal comfort, pedestrian	PD, SET, WV		1																																1					1
	58	Allegrini et al. (2015)	[202]	Building blocks	RANS / STKE		Energy (building), urban form / morphology, mitigation, case comparison, urban density	AT, BEC, ST, WV		1		1	1																				1
	59	Liu et al. (2015)	[203]	Building blocks	Not specified		Energy (building), climate, diurnal variation, model coupling, model development	AT, BEC, WV		1			1																				1
	60	Botham-Myint et al. (2015)	[204]	Building blocks	RANS / STKE		Materials (albedo), building form, thermal comfort, urban morphology, pedestrian	AT					1
	61	Allegrini et al. (2015)	[205]	Building blocks	RANS / STKE		Turbulent heat fluxes, energy (building), building form, ventilation, urban morphology	AT, HF, WV		1			1	1
										38	3	20	44	9	7	3	5	0	0	0	0	0	0	0	0	0	0	0	0	0	1	1	6	0	1	10	5	3	0	0	2	3	0	1	1	2	8	0	1
	1	Air temperature (°C) (AT);	44	72.1311
	2	Wind velocity (m/s) (WV);	38	62.2951
	3	Surface temperature (°C) (ST)	20	32.7869
	4	Mean radiant temperature(°C)(MRT);	10	16.3934
	5	Heat ﬂux (w/m2) (HF);	9	14.7541
	6	Standard eﬀective temperature(°C)[164](SET);	8	13.1148
	7	Convective heat transfer coeﬃcient (W/m2K) (CHTC);	7	11.4754
	8	Building energy consumption(W)(BEC);	6	9.83607
	9	Relative humidity (%) (RH)	5	8.19672
	10	Physiological equivalent temperature(°C)[161](PET);	5	8.19672
	11	Turbulentkineticenergy(m2/s2)(TKE);	4	6.55738
	12	Richardson number (-) (Ri)	3	4.91803
	13	Dry-bulb Temperature (°C) (DBT)	3	4.91803
	14	Predicted mean vote(-)[162](PMV);	3	4.91803
	15	Pressure distribution(PD);	3	4.91803
	16	Wet black globe temperature(°C)(WBGT);	2	3.27869
	17	Temperature of equivalent perception(°C)[165](TEP);	2	3.27869
	18	Solar radiation(W/m2)(SR);	2	3.27869
	19	Pollutant concentration(%)(PC);	2	3.27869
	20	Yamada and Mellor E-ε[158](YMEE).Air change rate(1/hour)(ACH);	1	1.63934
	21	Air quality index(-)(AQI);	1	1.63934
	22	Froude number (-)(Fn);Heatﬂux(w/m2)(HF);Indoorairtemperature(°C)(IAT);	1	1.63934
	23	Sky view factor(-)(SVF);	1	1.63934
	24	Solar access index(-)(SAI);	1	1.63934
	25	Temperature-humidity index(-)(THI);	1	1.63934
	26	Ventilation rate(l/minute)(VR);	1	1.63934
	27	Water vapor fraction(%)(WVF);	1	1.63934
	28	Wind comfort index(-)(WCI)	1	1.63934
	29	Wind velocity vectors(WVV).	1	1.63934
					4400
					72.1311
[truncated: 10 more columns]
